# Supplementary material for: Association of Glomerular Hyperfiltration and Cardiovascular Risk in Middle-Aged Healthy Individuals
Source: PubMed Central journal article supplement (PMC7148438; doi:10.1001/jamanetworkopen.2020.2377), 2020-04-10
Supplement: jamanetwopen-3-e202377-s001.pdf [file jamanetwopen-3-e202377-s001.pdf]

## Supplementary Online Content

Dupuis M-E, Nadeau-Fredette A-C, Madore F, Agharazii M, Goupil R. Association of glomerular hyperfiltration and cardiovascular risk in middle-aged healthy individuals. *JAMA Netw Open*. 2020;3(4):e202377. doi:10.1001/jamanetworkopen.2020.2377

**eTable 1.** Participants With Missing Data

**eTable 2.** eGFR Range by Age Decade and Sex According to Glomerular Filtration Status

**eTable 3.** Baseline Characteristics of Individuals Included in the Propensity Score-Matched Subgroup

**eTable 4.** Baseline Characteristics of CARTaGENE Participants With Stage 3a CKD (eGFR Between 45-60 mL/min/1.73m<sup>2</sup>) Compared to Subjects With Glomerular Hyperfiltration

**eTable 5.** Adjusted Blood Pressure Parameters According to Glomerular Filtration Status

**eFigure.** Study Design, Inclusions and Exclusions

This supplementary material has been provided by the authors to give readers additional information about their work.

**eTable 1: Participants with missing data.**

| <b>Missing data</b> | <b>Number of participants</b> | <b>percentage</b> |
|---------------------|-------------------------------|-------------------|
| Race                | 109                           | 2.1%              |
| Body mass index     | 39                            | 0.7%              |
| Lean body mass      | 166                           | 3.2%              |
| Smoking status      | 28                            | 0.5%              |
| Glucose             | 150                           | 2.9%              |
| Total cholesterol   | 129                           | 2.5%              |

All other variables have no missing data.

**eTable 2: eGFR range by age decade and sex according to glomerular filtration status.**

| Age group   | Sex    | Normal glomerular filtration rate |            | Glomerular Hyperfiltration |            |
|-------------|--------|-----------------------------------|------------|----------------------------|------------|
|             |        | Number of participants            | eGFR range | Number of participants     | eGFR range |
| 40-49 years | Male   | 1,015                             | 85 to 104  | 101                        | 111 to 190 |
|             | Female | 1,252                             | 85 to 105  | 125                        | 112 to 128 |
| 50-59 years | Male   | 728                               | 81 to 99   | 72                         | 106 to 121 |
|             | Female | 1,076                             | 79 to 99   | 107                        | 105 to 126 |
| 60-69 years | Male   | 284                               | 75 to 93   | 28                         | 98 to 105  |
|             | Female | 406                               | 75 to 93   | 40                         | 99 to 114  |

Estimated glomerular filtration rates (eGFR) are estimated using the CKD-EPI equation and expressed as mL/min/1.73m<sup>2</sup>.

**eTable 3: Baseline characteristics of individuals included in the propensity score-matched subgroup.**

| Characteristics                      | Normal glomerular filtration rate (n=406) | Glomerular hyperfiltration (n=406) | Absolute standardized difference (%) |
|--------------------------------------|-------------------------------------------|------------------------------------|--------------------------------------|
| Age (years)                          | 49 (46, 53)                               | 50 (44, 54)                        | 2.7                                  |
| Male sex                             | 178 (44%)                                 | 171 (42%)                          | 3.4                                  |
| Afro-American race                   | 39 (10%)                                  | 38 (9%)                            | 0.7                                  |
| Body mass index (kg/m <sup>2</sup> ) | 26 ± 6                                    | 26 ± 5                             | 1.1                                  |
| Lean body mass (kg)                  | 51 ± 10                                   | 50 ± 11                            | 5.3                                  |
| Obesity                              | 53 (13.1%)                                | 65 (16%)                           | 8.2                                  |
| Smoking (active)                     | 105 (26%)                                 | 107 (26%)                          | 1.1                                  |
| eGFR (mL/min/1.73m <sup>2</sup> )    | 94 (88, 99)                               | 112 (106, 115)                     | -                                    |
| Framingham Risk Score (%)            | 7.2 ± 6.0                                 | 7.5 ± 6.9                          | 4.8                                  |
| Glucose (mg/dL)                      | 5.2 ± 0.9                                 | 5.3 ± 1.0                          | 2.4                                  |
| Total cholesterol (mg/dL)            | 197 ± 35                                  | 197 ± 35                           | 0.2                                  |
| LDL-cholesterol (mg/dL)              | 120 ± 31                                  | 120 ± 31                           | 0.5                                  |
| HDL cholesterol (mg/dL)              | 50 ± 4                                    | 50 ± 19                            | 3.9                                  |
| Systolic BP (mmHg)                   | 117 ± 12                                  | 118 ± 11                           | 0.2                                  |
| Diastolic BP (mmHg)                  | 71 ± 9                                    | 71 ± 9                             | 5.0                                  |
| Heart rate (bpm)                     | 68 ± 11                                   | 68 ± 10                            | 2.7                                  |

Values are expressed mean ± standard deviation or median (25<sup>th</sup>, 75<sup>th</sup> percentiles) as appropriate. Matching variables include age, sex, Afro-American race, active smoking, body mass index, lean-body mass, fasting glucose, LDL-cholesterol, total cholesterol, mean arterial pressure and heart rate. Absolute standardized differences < 10% indicate adequate balance. Abbreviations as defined in Supplemental Table 1.

**eTable 4: Baseline characteristics of CARTaGENE participants with stage 3a CKD (eGFR between 45-60 mL/min/1.73m<sup>2</sup>) compared to subjects with glomerular hyperfiltration.**

| Characteristics                      | Stage 3a CKD (n=597) | Glomerular hyperfiltration (n=473) | P value |
|--------------------------------------|----------------------|------------------------------------|---------|
| Age (years)                          | 63 (56, 67)          | 50 (43, 53)                        | <0.001  |
| Male sex                             | 290 (49%)            | 201 (43%)                          | 0.05    |
| Afro-American race                   | 9 (2%)               | 47 (10%)                           | <0.001  |
| Body mass index (kg/m <sup>2</sup> ) | 29 ± 6               | 26 ± 5                             | <0.001  |
| Lean body mass (kg)                  | 53 ± 12              | 50 ± 11                            | <0.001  |
| Diabetes                             | 113 (12%)            | 0 (0%)                             | <0.001  |
| Past cardiovascular disease          | 73 (19%)             | 0 (0%)                             | <0.001  |
| Treated hypertension                 | 286 (48%)            | 0 (0%)                             | <0.001  |
| Obesity                              | 204 (34%)            | 78 (17%)                           | <0.001  |
| Smoking (active)                     | 81 (14%)             | 122 (26%)                          | <0.001  |
| eGFR (mL/min/1.73m <sup>2</sup> )    | 56 (52, 58)          | 112 (107, 115)                     | <0.001  |
| Framingham Risk Score (%)            | 18 ± 15              | 8 ± 7                              | <0.001  |
| Glucose (mg/dL)                      | 112 ± 41             | 94 ± 18                            | <0.001  |
| Total cholesterol (mg/dL)            | 193 ± 46             | 197 ± 39                           | 0.2     |
| LDL-cholesterol (mg/dL)              | 112 ± 39             | 120 ± 31                           | 0.001   |
| HDL cholesterol (mg/dL)              | 46 ± 15              | 50 ± 19                            | <0.001  |
| Systolic BP (mmHg)                   | 126 ± 16             | 118 ± 11                           | <0.001  |
| Diastolic BP (mmHg)                  | 72 ± 10              | 71 ± 9                             | 0.8     |
| Heart rate (bpm)                     | 69 ± 12              | 69 ± 10                            | 1.0     |
| Aspirin                              | 154 (26%)            | 0 (0%)                             | <0.001  |
| Statins                              | 195 (33%)            | 0 (0%)                             | <0.001  |
| Renin-angiotensin blockers           | 222 (37%)            | 0 (0%)                             | <0.001  |
| Calcium-channel blockers             | 85 (14%)             | 0 (0%)                             | <0.001  |
| Beta-blockers                        | 92 (15%)             | 0 (0%)                             | <0.001  |
| Diuretics                            | 112 (19%)            | 0 (0%)                             | <0.001  |

Values are expressed as mean ± standard deviation or median (25<sup>th</sup>, 75<sup>th</sup> percentiles). To convert glucose and cholesterol to SI units (mmol/L), divide by 18 and 38.7. eGFR, estimated glomerular filtration rate; LDL, low-density lipoprotein; HDL, high-density lipoprotein; BP, blood pressure.

**eTable 5: Adjusted blood pressure parameters according to glomerular filtration status.**

| <b>Adjusted BP parameters</b> | <b>Normal glomerular filtration rate</b> | <b>Glomerular Hyperfiltration</b> | <b>p-value</b> |
|-------------------------------|------------------------------------------|-----------------------------------|----------------|
| Systolic BP (mmHg)            | 119 (118-120)                            | 119 (118-121)                     | 0.3            |
| Diastolic BP (mmHg)           | 72 (71-73)                               | 72 (71-73)                        | 1.0            |
| Pulse pressure (mmHg)         | 47 (46-48)                               | 47 (47-48)                        | 0.1            |
| Central systolic BP (mmHg)    | 110 (109-111)                            | 110 (109-112)                     | 0.2            |
| Central diastolic BP (mmHg)   | 73 (72-74)                               | 73 (72-74)                        | 1.0            |
| Central pulse pressure (mmHg) | 37 (36-37)                               | 38 (37-38)                        | 0.02           |
| Augmentation index (%)        | 28 (27-29)                               | 29 (28-30)                        | 0.001          |
| Pulse pressure amplification  | 1.29 (1.28-1.30)                         | 1.28 (1.26-1.29)                  | 0.007          |
| Augmented pressure (mmHg)     | 10 (10-11)                               | 11 (11-12)                        | 0.001          |
| BP amplification (mmHg)       | 9.1 (8.8-9.5)                            | 9.0 (8.5-9.3)                     | 0.3            |

Estimated marginal means (95% confidence interval) adjusted for age, sex, Afro-American race, active smoking, body mass index, lean-body mass, fasting glucose, LDL-cholesterol, total cholesterol, mean arterial pressure and heart rate. BP, blood pressure.

**eFigure: Study design, inclusions and exclusions.**

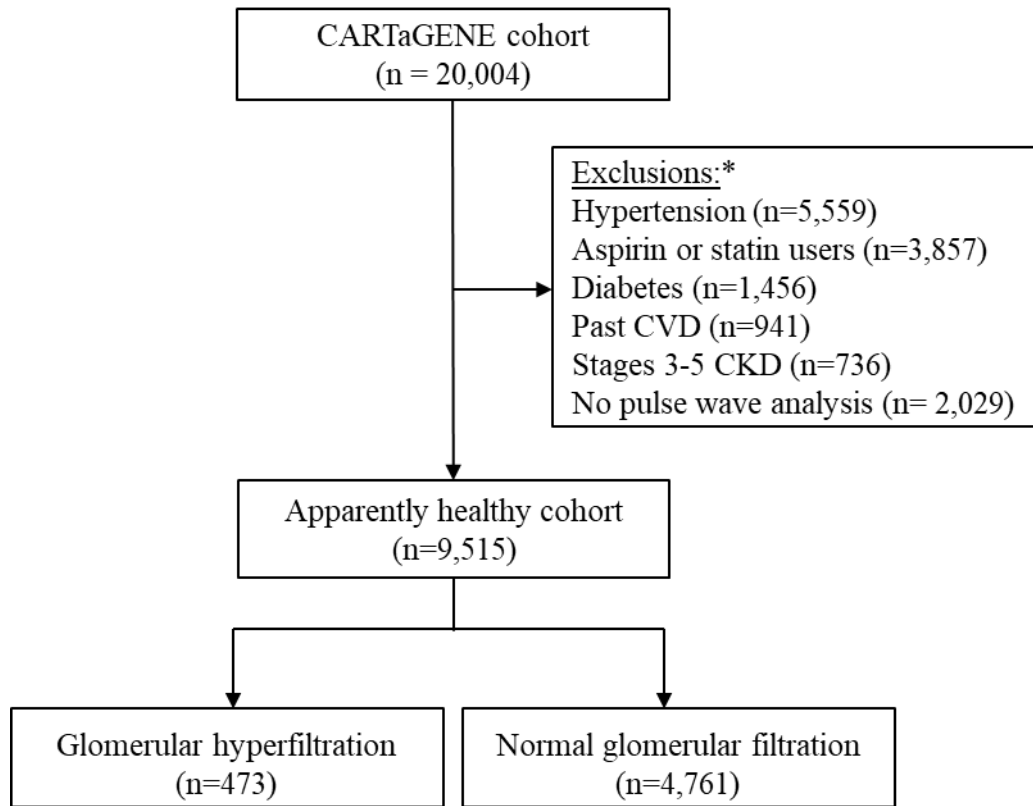

Glomerular hyperfiltration defined as an eGFR > 95<sup>th</sup> percentile after stratification for age decade and sex and normal glomerular filtration as an eGFR between the 25<sup>th</sup> and 75<sup>th</sup> percentiles. Participants with stage 3a CKD (n=597) were used as a secondary comparator group, irrespective of the presence of other excluded comorbidities.

\* some individuals have more than one exclusion.
